# Supplementary material for: Anthropogenic influences on Zambian water quality: hydropower and land-use change
Source: Royal Society of Chemistry journal article supplement (doi:10.1039/d1em00006c), 2021-01-01
Supplement: d1em00006c1.pdf [file d1em00006c1.pdf]

**Electronic supplemental information for:**

## Anthropogenic influences on Zambian water quality: hydropower and land-use change

R. Scott Winton<sup>1,2</sup>, Cristian R. Teodoru<sup>1</sup>, Elisa Calamita<sup>1,2</sup>, Fritz Kleinschroth<sup>3</sup>, Kawawa Banda<sup>4</sup>, Imasiku Nyambe<sup>4</sup>, Bernhard Wehrli<sup>1,2</sup>

<sup>1</sup>Institute of Biogeochemistry and Pollutant Dynamics, ETH Zurich, 8092 Zurich, Switzerland

<sup>2</sup>Department of Surface Waters, Eawag, Swiss Federal Institution of Aquatic Science and Technology, 6047 Kastanienbaum, Switzerland

<sup>3</sup>Ecosystem Management, Department of Environmental Systems Science, ETH Zurich, 8092 Zurich, Switzerland

<sup>4</sup>Integrated Water Resources Management Centre, C/O Geology Department, School of Mines, University of Zambia, P. O. Box 32379, Lusaka, Zambia

**Table S1.** Comparison of rainy season specific conductivity, phosphorus and nitrogen content of small heavily impacted and small minimally impacted reference catchments in Zambia.

| Site name             | date       | Lat     | Long   | footprint | YSI_SpC | FIA_TP | FIA_TN |
|-----------------------|------------|---------|--------|-----------|---------|--------|--------|
| Zambezi source        | 2019_03_02 | -11.350 | 24.328 | minimal   | 7.8     | 0.8    | 33     |
| Munsakamba Prison     | 2019_11_20 | -13.499 | 29.294 | minimal   | 428     | 2.5    | 82     |
| Funda Stream          | 2019_11_20 | -13.561 | 29.493 | minimal   | 8.9     | 4.2    | 80     |
| Chibefwe at Chipata   | 2019_11_21 | -13.542 | 29.554 | minimal   | 14.8    | 1.2    | 78     |
| Nkolonga at Pita Lesa | 2019_11_21 | -13.489 | 29.609 | minimal   | 16.3    | 1.3    | 59     |
| Mulumbwashi Stream    | 2019_11_23 | -13.365 | 29.461 | minimal   | 19.8    | 7.9    | 95     |
| Changwena mining camp | 2019_11_23 | -13.399 | 29.492 | minimal   | 37.3    | 12.1   | 96     |
| Chongwe               | 2018_03_21 | -15.709 | 29.339 | high      | NA      | 18.7   | 400    |
| Chongwe               | 2019_02_14 | -15.709 | 29.339 | high      | 455     | 25.3   | 444    |
| Little Chongwe        | 2018_03_22 | -15.949 | 28.845 | high      | 521     | 24.3   | 1127   |
| Little Chongwe        | 2019_02_14 | -15.949 | 28.845 | high      | 430     | 15.0   | 719    |
| Maramba               | 2018_03_16 | -17.887 | 25.859 | high      | 534     | 22.3   | 660    |
| Maramba               | 2019_02_21 | -17.887 | 25.859 | high      | 481     | 49.3   | 1282   |

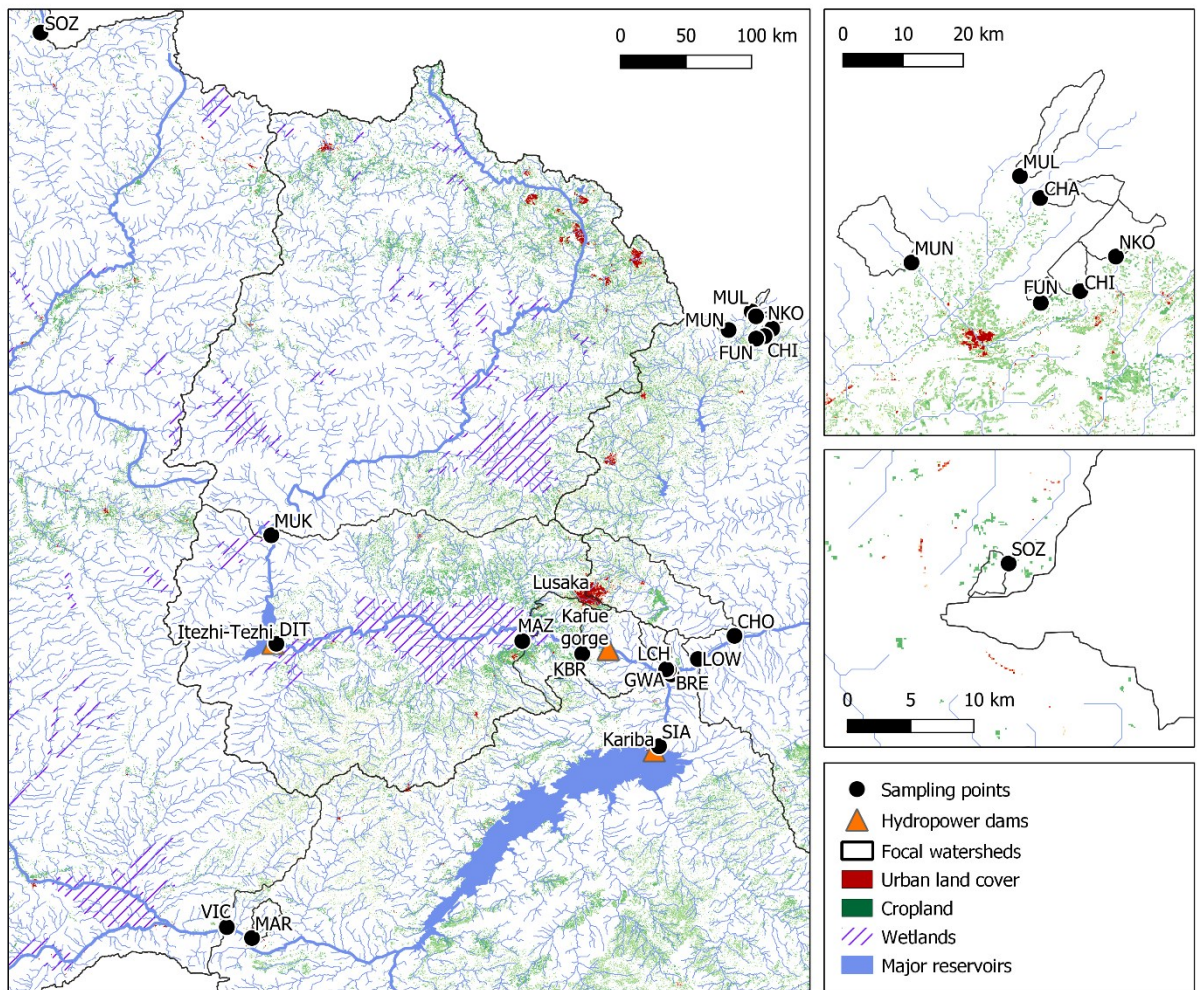

**Fig. S1.** Map of study area including locations of small catchments draining mostly forested protected areas including the Zambezi Source Protected Forest and North Swaka Forest Reserve.

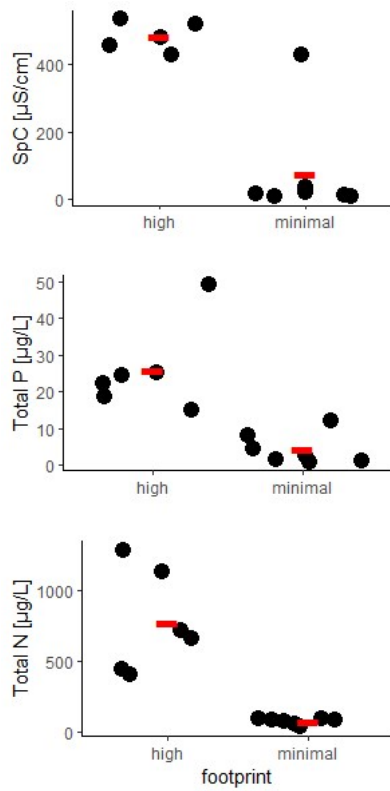

**Figure S2.** Visualization of specific conductivity, phosphorus and nitrogen content of small heavily impacted and small minimally impacted catchments in Zambia (from Table S1). Red bar highlights arithmetic mean of two groups. High conductivity value of one of the reference sites reflects the local limestone geology and the site has a high concentration of calcium cations and there is a lime mine nearby. This illustrates a limitation of relying on conductivity alone as a water quality indicator.
